# Supplementary material for: Intraspecies differences in natural susceptibility to amphotericine B of clinical isolates of Leishmania subgenus Viannia
Source: PubMed Central journal article supplement (PMC5919572; doi:10.1371/journal.pone.0196247), 2018-04-26
Supplement: pone.0196247.s001.pdf [file pone.0196247.s001.pdf]

**S1 table. Parasites number quantification after AmB exposure**

| Strain                                 | Specie                      | AmB (µg/ml) | Parasite number in experiment 1 | Parasite number in experiment 2 | Parasite number in experiment 3 | mean            |
|----------------------------------------|-----------------------------|-------------|---------------------------------|---------------------------------|---------------------------------|-----------------|
| Leishmania panamensis Sensitive        | <i>L. (V.) panamensis</i>   | 0.500       | 1.77E+07                        | 1.10E+07                        | 1.47E+07                        | 1.45E+07        |
|                                        |                             | 0.170       | 7.44E+06                        | 9.46E+06                        | 4.60E+07                        | 2.10E+07        |
|                                        |                             | 0.060       | 2.33E+07                        | 2.39E+07                        | 2.78E+07                        | 2.50E+07        |
|                                        |                             | 0.020       | 2.08E+07                        | 3.18E+07                        | 2.81E+07                        | 2.69E+07        |
|                                        |                             | 0.000       | 3.20E+07                        | 3.90E+07                        | 3.84E+07                        | <b>3.65E+07</b> |
| Leishmania panamensis Less sensitive   | <i>L. (V.) panamensis</i>   | 0.500       | 4.59E+07                        | 3.46E+07                        | 6.20E+07                        | 4.75E+07        |
|                                        |                             | 0.170       | 5.76E+07                        | 4.20E+07                        | 5.30E+07                        | 5.09E+07        |
|                                        |                             | 0.060       | 6.20E+07                        | 6.64E+07                        | 5.27E+07                        | 6.04E+07        |
|                                        |                             | 0.020       | 6.37E+07                        | 6.84E+07                        | 5.96E+07                        | 6.39E+07        |
|                                        |                             | 0.000       | 7.76E+07                        | 6.80E+07                        | 5.29E+07                        | <b>6.62E+07</b> |
| Leishmania braziliensis Sensitive      | <i>L. (V.) braziliensis</i> | 0.500       | 2.28E+07                        | 2.55E+07                        | 2.07E+07                        | 2.30E+07        |
|                                        |                             | 0.170       | 4.14E+07                        | 2.89E+07                        | 2.25E+07                        | 3.09E+07        |
|                                        |                             | 0.060       | 3.69E+07                        | 5.00E+07                        | 3.31E+07                        | 4.00E+07        |
|                                        |                             | 0.020       | 4.56E+07                        | 5.31E+07                        | 3.98E+07                        | 4.62E+07        |
|                                        |                             | 0.000       | 4.56E+07                        | 5.98E+07                        | 4.03E+07                        | <b>4.85E+07</b> |
| Leishmania braziliensis Less sensitive | <i>L. (V.) braziliensis</i> | 0.500       | 4.07E+07                        | 2.92E+07                        | 4.98E+07                        | 3.99E+07        |
|                                        |                             | 0.170       | 5.15E+07                        | 4.21E+07                        | 5.32E+07                        | 4.89E+07        |
|                                        |                             | 0.060       | 7.12E+07                        | 5.72E+07                        | 6.53E+07                        | 6.46E+07        |
|                                        |                             | 0.020       | 5.28E+07                        | 6.71E+07                        | 8.22E+07                        | 6.74E+07        |
|                                        |                             | 0.000       | 8.06E+07                        | 7.01E+07                        | 5.17E+07                        | <b>6.75E+07</b> |
| Leishmania guyanensis Sensitive        | <i>L. (V.) guyanensis</i>   | 0.500       | 1.92E+06                        | 4.94E+06                        | 5.86E+06                        | 4.24E+06        |
|                                        |                             | 0.170       | 1.17E+07                        | 2.87E+06                        | 9.40E+06                        | 7.98E+06        |
|                                        |                             | 0.060       | 8.62E+06                        | 7.98E+06                        | 8.46E+06                        | 8.35E+06        |
|                                        |                             | 0.020       | 8.86E+06                        | 1.21E+07                        | 1.31E+07                        | 1.13E+07        |
|                                        |                             | 0.000       | 1.36E+07                        | 9.36E+06                        | 1.26E+07                        | <b>1.18E+07</b> |
| LL010                                  | <i>L. (V.) braziliensis</i> | 0.500       | 7.44E+06                        | 5.76E+06                        | 8.17E+06                        | 7.12E+06        |
|                                        |                             | 0.170       | 6.93E+06                        | 9.09E+06                        | 9.60E+06                        | 8.54E+06        |
|                                        |                             | 0.060       | 9.22E+06                        | 9.26E+06                        | 9.92E+06                        | 9.46E+06        |
|                                        |                             | 0.020       | 1.17E+07                        | 1.01E+07                        | 1.02E+07                        | 1.07E+07        |
|                                        |                             | 0.000       | 1.10E+07                        | 8.62E+06                        | 1.28E+07                        | <b>1.08E+07</b> |
| LL014                                  | <i>L. (V.) braziliensis</i> | 0.500       | 2.27E+06                        | 2.99E+06                        | 2.78E+06                        | 2.68E+06        |
|                                        |                             | 0.170       | 8.68E+06                        | 7.94E+06                        | 8.90E+06                        | 8.50E+06        |
|                                        |                             | 0.060       | 1.20E+07                        | 1.11E+07                        | 1.41E+07                        | 1.24E+07        |
|                                        |                             | 0.020       | 1.17E+07                        | 1.31E+07                        | 9.09E+06                        | 1.13E+07        |
|                                        |                             | 0.000       | 1.31E+07                        | 1.12E+07                        | 1.28E+07                        | <b>1.24E+07</b> |
| LL027                                  | <i>L. (V.) braziliensis</i> | 0.500       | 9.94E+05                        | 8.36E+05                        | 1.10E+06                        | 9.77E+05        |
|                                        |                             | 0.170       | 6.20E+05                        | 6.29E+05                        | 6.44E+05                        | 6.31E+05        |
|                                        |                             | 0.060       | 1.07E+06                        | 9.01E+05                        | 1.01E+06                        | 9.95E+05        |

|       |                                 |       |          |          |          |          |
|-------|---------------------------------|-------|----------|----------|----------|----------|
|       |                                 | 0.020 | 2.80E+06 | 2.30E+06 | 2.14E+06 | 2.41E+06 |
|       |                                 | 0.000 | 1.15E+06 | 2.02E+06 | 1.63E+06 | 1.60E+06 |
| LL033 | <i>L. (V.)<br/>braziliensis</i> | 0.500 | 6.04E+06 | 6.12E+06 | 6.56E+06 | 6.24E+06 |
|       |                                 | 0.170 | 7.25E+06 | 6.62E+06 | 9.25E+06 | 7.71E+06 |
|       |                                 | 0.060 | 8.23E+06 | 7.22E+06 | 5.27E+06 | 6.91E+06 |
|       |                                 | 0.020 | 1.26E+07 | 1.23E+07 | 9.83E+06 | 1.16E+07 |
|       |                                 | 0.000 | 8.20E+06 | 1.01E+07 | 8.78E+06 | 9.04E+06 |
| LL035 | <i>L. (V.)<br/>braziliensis</i> | 0.500 | 2.01E+06 | 9.38E+05 | 1.25E+06 | 1.40E+06 |
|       |                                 | 0.170 | 1.96E+06 | 2.07E+06 | 1.92E+06 | 1.98E+06 |
|       |                                 | 0.060 | 2.51E+06 | 3.18E+06 | 2.84E+06 | 2.85E+06 |
|       |                                 | 0.020 | 3.53E+06 | 2.47E+06 | 2.20E+06 | 2.73E+06 |
|       |                                 | 0.000 | 3.84E+06 | 3.72E+06 | 3.41E+06 | 3.66E+06 |
| LL036 | <i>L. (V.)<br/>braziliensis</i> | 0.500 | 3.22E+06 | 4.00E+06 | 2.98E+06 | 3.40E+06 |
|       |                                 | 0.170 | 4.28E+06 | 4.87E+06 | 3.80E+06 | 4.32E+06 |
|       |                                 | 0.060 | 2.45E+06 | 2.29E+06 | 2.64E+06 | 2.46E+06 |
|       |                                 | 0.020 | 6.51E+06 | 6.16E+06 | 5.76E+06 | 6.14E+06 |
|       |                                 | 0.000 | 8.77E+06 | 1.03E+07 | 7.85E+06 | 8.98E+06 |
| LL223 | <i>L. (V.)<br/>braziliensis</i> | 0.500 | 3.77E+06 | 3.87E+06 | 3.99E+06 | 3.88E+06 |
|       |                                 | 0.170 | 9.69E+06 | 7.89E+06 | 6.79E+06 | 8.13E+06 |
|       |                                 | 0.060 | 8.25E+06 | 6.01E+06 | 7.12E+06 | 7.13E+06 |
|       |                                 | 0.020 | 9.02E+06 | 8.85E+06 | 1.12E+07 | 9.69E+06 |
|       |                                 | 0.000 | 9.89E+06 | 8.37E+06 | 9.81E+06 | 9.35E+06 |
| LL051 | <i>L. (V.)<br/>panamensis</i>   | 0.500 | 2.93E+07 | 3.26E+07 | 3.09E+07 | 3.09E+07 |
|       |                                 | 0.170 | 2.93E+07 | 3.72E+07 | 2.83E+07 | 3.16E+07 |
|       |                                 | 0.060 | 3.27E+07 | 4.15E+07 | 3.49E+07 | 3.64E+07 |
|       |                                 | 0.020 | 5.22E+07 | 5.51E+07 | 5.01E+07 | 5.25E+07 |
|       |                                 | 0.000 | 5.87E+07 | 5.27E+07 | 5.57E+07 | 5.57E+07 |
| LL045 | <i>L. (V.)<br/>panamensis</i>   | 0.500 | 2.31E+07 | 2.64E+07 | 2.48E+07 | 2.48E+07 |
|       |                                 | 0.170 | 2.31E+07 | 3.11E+07 | 2.21E+07 | 2.54E+07 |
|       |                                 | 0.060 | 2.65E+07 | 3.53E+07 | 2.88E+07 | 3.02E+07 |
|       |                                 | 0.020 | 4.60E+07 | 4.89E+07 | 4.39E+07 | 4.63E+07 |
|       |                                 | 0.000 | 5.25E+07 | 4.65E+07 | 4.95E+07 | 4.95E+07 |
| LL055 | <i>L. (V.)<br/>panamensis</i>   | 0.500 | 1.96E+07 | 1.84E+07 | 2.70E+07 | 2.17E+07 |
|       |                                 | 0.170 | 2.05E+07 | 2.39E+07 | 2.39E+07 | 2.28E+07 |
|       |                                 | 0.060 | 3.07E+07 | 3.37E+07 | 3.03E+07 | 3.16E+07 |
|       |                                 | 0.020 | 2.77E+07 | 4.33E+07 | 3.92E+07 | 3.68E+07 |
|       |                                 | 0.000 | 3.50E+07 | 4.24E+07 | 4.13E+07 | 3.96E+07 |
| LL058 | <i>L. (V.)<br/>panamensis</i>   | 0.500 | 2.69E+07 | 3.11E+07 | 2.66E+07 | 2.82E+07 |
|       |                                 | 0.170 | 3.67E+07 | 3.49E+07 | 2.84E+07 | 3.33E+07 |
|       |                                 | 0.060 | 2.89E+07 | 3.23E+07 | 3.61E+07 | 3.24E+07 |
|       |                                 | 0.020 | 4.63E+07 | 3.82E+07 | 4.08E+07 | 4.17E+07 |
|       |                                 | 0.000 | 5.27E+07 | 5.34E+07 | 5.20E+07 | 5.27E+07 |
| LL072 | <i>L. (V.)<br/>panamensis</i>   | 0.500 | 3.10E+07 | 3.02E+07 | 3.17E+07 | 3.10E+07 |
|       |                                 | 0.170 | 3.85E+07 | 3.14E+07 | 3.64E+07 | 3.55E+07 |

|       |                             |       |          |          |          |          |
|-------|-----------------------------|-------|----------|----------|----------|----------|
|       |                             | 0.060 | 3.37E+07 | 2.97E+07 | 4.70E+07 | 3.68E+07 |
|       |                             | 0.020 | 2.99E+07 | 5.31E+07 | 5.13E+07 | 4.48E+07 |
|       |                             | 0.000 | 4.81E+07 | 3.96E+07 | 3.48E+07 | 4.08E+07 |
| LL074 | <i>L. (V.) panamensis</i>   | 0.500 | 4.38E+07 | 4.41E+07 | 4.38E+07 | 4.39E+07 |
|       |                             | 0.170 | 5.72E+07 | 5.70E+07 | 6.05E+07 | 5.82E+07 |
|       |                             | 0.060 | 6.64E+07 | 7.99E+07 | 6.60E+07 | 7.08E+07 |
|       |                             | 0.020 | 9.17E+07 | 1.18E+08 | 1.00E+08 | 1.03E+08 |
|       |                             | 0.000 | 7.48E+07 | 9.07E+07 | 1.01E+08 | 8.87E+07 |
| LL078 | <i>L. (V.) guyanensis</i>   | 0.500 | 1.28E+07 | 3.60E+06 | 9.73E+06 | 8.73E+06 |
|       |                             | 0.170 | 1.13E+07 | 1.23E+07 | 1.17E+07 | 1.17E+07 |
|       |                             | 0.060 | 1.50E+07 | 9.90E+06 | 1.29E+07 | 1.26E+07 |
|       |                             | 0.020 | 1.17E+07 | 9.72E+06 | 1.19E+07 | 1.11E+07 |
|       |                             | 0.000 | 1.25E+07 | 8.52E+06 | 1.17E+07 | 1.09E+07 |
| LL086 | <i>L. (V.) braziliensis</i> | 0.500 | 2.46E+05 | 2.53E+05 | 2.03E+05 | 2.34E+05 |
|       |                             | 0.170 | 9.92E+05 | 9.92E+05 | 8.95E+05 | 9.59E+05 |
|       |                             | 0.060 | 5.99E+05 | 4.65E+05 | 3.38E+05 | 4.67E+05 |
|       |                             | 0.020 | 3.54E+06 | 3.62E+06 | 3.78E+06 | 3.65E+06 |
|       |                             | 0.000 | 5.73E+06 | 3.87E+06 | 4.56E+06 | 4.72E+06 |
| LL106 | <i>L. (V.) panamensis</i>   | 0.500 | 6.58E+06 | 6.14E+06 | 5.94E+06 | 6.22E+06 |
|       |                             | 0.170 | 2.36E+07 | 3.20E+07 | 2.49E+07 | 2.68E+07 |
|       |                             | 0.060 | 1.88E+07 | 2.69E+07 | 3.05E+07 | 2.54E+07 |
|       |                             | 0.020 | 3.05E+07 | 2.85E+07 | 3.22E+07 | 3.04E+07 |
|       |                             | 0.000 | 3.31E+07 | 2.90E+07 | 3.27E+07 | 3.16E+07 |
| LL107 | <i>L. (V.) panamensis</i>   | 0.500 | 2.85E+07 | 2.66E+07 | 2.31E+07 | 2.61E+07 |
|       |                             | 0.170 | 2.84E+07 | 2.74E+07 | 2.90E+07 | 2.83E+07 |
|       |                             | 0.060 | 3.00E+07 | 2.82E+07 | 2.74E+07 | 2.85E+07 |
|       |                             | 0.020 | 3.03E+07 | 3.72E+07 | 3.09E+07 | 3.28E+07 |
|       |                             | 0.000 | 3.39E+07 | 3.39E+07 | 3.77E+07 | 3.52E+07 |
| LL110 | <i>L. (V.) braziliensis</i> | 0.500 | 6.11E+04 | 9.05E+04 | 6.88E+04 | 7.34E+04 |
|       |                             | 0.170 | 1.14E+05 | 1.16E+05 | 8.02E+04 | 1.03E+05 |
|       |                             | 0.060 | 1.56E+05 | 1.30E+05 | 1.49E+05 | 1.45E+05 |
|       |                             | 0.020 | 1.54E+05 | 1.77E+05 | 1.13E+05 | 1.48E+05 |
|       |                             | 0.000 | 1.52E+05 | 1.53E+05 | 1.78E+05 | 1.61E+05 |
| LL117 | <i>L. (V.) panamensis</i>   | 0.500 | 2.02E+07 | 1.75E+07 | 2.03E+07 | 1.93E+07 |
|       |                             | 0.170 | 1.24E+07 | 2.60E+07 | 2.51E+07 | 2.12E+07 |
|       |                             | 0.060 | 2.73E+07 | 2.81E+07 | 2.77E+07 | 2.77E+07 |
|       |                             | 0.020 | 3.34E+07 | 4.36E+07 | 3.54E+07 | 3.75E+07 |
|       |                             | 0.000 | 5.53E+07 | 7.95E+07 | 6.28E+07 | 6.59E+07 |
| LL113 | <i>L. (V.) panamensis</i>   | 0.500 | 2.32E+07 | 2.34E+07 | 2.58E+07 | 2.41E+07 |
|       |                             | 0.170 | 2.38E+07 | 2.80E+07 | 2.48E+07 | 2.55E+07 |
|       |                             | 0.060 | 2.54E+07 | 2.79E+07 | 4.12E+07 | 3.15E+07 |
|       |                             | 0.020 | 3.24E+07 | 3.95E+07 | 2.76E+07 | 3.32E+07 |
|       |                             | 0.000 | 4.41E+07 | 3.19E+07 | 2.61E+07 | 3.40E+07 |
| LL119 | <i>L. (V.) panamensis</i>   | 0.500 | 5.41E+06 | 5.91E+06 | 5.53E+06 | 5.62E+06 |

|       |                           |       |          |          |          |          |
|-------|---------------------------|-------|----------|----------|----------|----------|
|       |                           | 0.170 | 1.87E+07 | 1.59E+07 | 1.42E+07 | 1.63E+07 |
|       |                           | 0.060 | 2.68E+07 | 2.33E+07 | 2.74E+07 | 2.59E+07 |
|       |                           | 0.020 | 2.66E+07 | 1.81E+07 | 2.72E+07 | 2.39E+07 |
|       |                           | 0.000 | 2.90E+07 | 3.17E+07 | 3.96E+07 | 3.35E+07 |
| LL123 | <i>L. (V.) panamensis</i> | 0.500 | 1.95E+07 | 1.04E+07 | 1.50E+07 | 1.49E+07 |
|       |                           | 0.170 | 2.09E+07 | 2.34E+07 | 2.25E+07 | 2.23E+07 |
|       |                           | 0.060 | 2.06E+07 | 2.86E+07 | 1.81E+07 | 2.24E+07 |
|       |                           | 0.020 | 3.94E+07 | 3.34E+07 | 3.94E+07 | 3.74E+07 |
|       |                           | 0.000 | 2.46E+07 | 2.73E+07 | 2.53E+07 | 2.57E+07 |
| LL125 | <i>L. (V.) panamensis</i> | 0.500 | 3.23E+07 | 4.89E+07 | 4.58E+07 | 4.23E+07 |
|       |                           | 0.170 | 4.38E+07 | 3.99E+07 | 4.46E+07 | 4.28E+07 |
|       |                           | 0.060 | 4.77E+07 | 4.72E+07 | 4.41E+07 | 4.63E+07 |
|       |                           | 0.020 | 4.89E+07 | 5.02E+07 | 6.23E+07 | 5.38E+07 |
|       |                           | 0.000 | 5.12E+07 | 5.42E+07 | 5.17E+07 | 5.24E+07 |
| LL152 | <i>L. (V.) panamensis</i> | 0.500 | 2.27E+07 | 1.82E+07 | 2.09E+07 | 2.06E+07 |
|       |                           | 0.170 | 4.18E+07 | 3.96E+07 | 2.67E+07 | 3.60E+07 |
|       |                           | 0.060 | 3.18E+07 | 3.68E+07 | 3.40E+07 | 3.42E+07 |
|       |                           | 0.020 | 2.99E+07 | 4.16E+07 | 3.20E+07 | 3.45E+07 |
|       |                           | 0.000 | 5.08E+07 | 3.39E+07 | 4.35E+07 | 4.27E+07 |
| LL126 | <i>L. (V.) panamensis</i> | 0.500 | 1.03E+07 | 9.92E+06 | 1.22E+07 | 1.08E+07 |
|       |                           | 0.170 | 1.06E+07 | 1.29E+07 | 1.17E+07 | 1.18E+07 |
|       |                           | 0.060 | 1.10E+07 | 1.18E+07 | 1.43E+07 | 1.24E+07 |
|       |                           | 0.020 | 1.78E+07 | 1.59E+07 | 1.65E+07 | 1.67E+07 |
|       |                           | 0.000 | 1.98E+07 | 1.82E+07 | 1.63E+07 | 1.81E+07 |
| LL129 | <i>L. (V.) panamensis</i> | 0.500 | 2.20E+07 | 2.41E+07 | 3.10E+07 | 2.57E+07 |
|       |                           | 0.170 | 3.99E+07 | 3.49E+07 | 4.27E+07 | 3.92E+07 |
|       |                           | 0.060 | 4.51E+07 | 3.79E+07 | 3.67E+07 | 3.99E+07 |
|       |                           | 0.020 | 8.59E+07 | 7.51E+07 | 8.50E+07 | 8.20E+07 |
|       |                           | 0.000 | 1.04E+08 | 1.18E+08 | 9.05E+07 | 1.04E+08 |
| LL131 | <i>L. (V.) panamensis</i> | 0.500 | 1.09E+07 | 1.21E+07 | 1.35E+07 | 1.21E+07 |
|       |                           | 0.170 | 1.73E+07 | 1.88E+07 | 1.73E+07 | 1.78E+07 |
|       |                           | 0.060 | 1.33E+07 | 2.04E+07 | 2.24E+07 | 1.87E+07 |
|       |                           | 0.020 | 2.17E+07 | 2.22E+07 | 1.72E+07 | 2.04E+07 |
|       |                           | 0.000 | 2.44E+07 | 1.99E+07 | 2.32E+07 | 2.25E+07 |
| LL138 | <i>L. (V.) panamensis</i> | 0.500 | 8.14E+05 | 7.78E+04 | 8.25E+05 | 5.72E+05 |
|       |                           | 0.170 | 9.89E+05 | 8.57E+05 | 8.66E+05 | 9.04E+05 |
|       |                           | 0.060 | 7.17E+06 | 7.51E+06 | 1.01E+07 | 8.25E+06 |
|       |                           | 0.020 | 6.99E+06 | 7.73E+06 | 5.16E+06 | 6.63E+06 |
|       |                           | 0.000 | 2.59E+07 | 2.59E+07 | 1.69E+07 | 2.29E+07 |
| LL186 | <i>L. (V.) panamensis</i> | 0.500 | 1.16E+07 | 1.10E+07 | 1.10E+07 | 1.12E+07 |
|       |                           | 0.170 | 9.94E+06 | 1.60E+07 | 1.47E+07 | 1.35E+07 |
|       |                           | 0.060 | 1.58E+07 | 1.17E+07 | 1.74E+07 | 1.49E+07 |
|       |                           | 0.020 | 1.77E+07 | 1.54E+07 | 1.72E+07 | 1.68E+07 |
|       |                           | 0.000 | 1.59E+07 | 1.76E+07 | 1.43E+07 | 1.59E+07 |

|       |                             |       |          |          |          |          |
|-------|-----------------------------|-------|----------|----------|----------|----------|
| LL142 | <i>L. (V.) panamensis</i>   | 0.500 | 9.04E+06 | 1.16E+07 | 6.40E+06 | 9.00E+06 |
|       |                             | 0.170 | 1.87E+07 | 1.29E+07 | 1.86E+07 | 1.67E+07 |
|       |                             | 0.060 | 1.62E+07 | 2.12E+07 | 1.81E+07 | 1.85E+07 |
|       |                             | 0.020 | 1.40E+07 | 1.87E+07 | 1.58E+07 | 1.62E+07 |
|       |                             | 0.000 | 2.77E+07 | 2.16E+07 | 2.63E+07 | 2.52E+07 |
| LL277 | <i>L. (V.) braziliensis</i> | 0.500 | 7.14E+06 | 9.27E+06 | 9.70E+06 | 8.70E+06 |
|       |                             | 0.170 | 2.60E+07 | 2.47E+07 | 2.10E+07 | 2.39E+07 |
|       |                             | 0.060 | 2.04E+07 | 2.03E+07 | 3.37E+07 | 2.48E+07 |
|       |                             | 0.020 | 4.67E+07 | 4.62E+07 | 4.45E+07 | 4.58E+07 |
|       |                             | 0.000 | 4.14E+07 | 5.49E+07 | 4.46E+07 | 4.70E+07 |
| LL282 | <i>L. (V.) braziliensis</i> | 0.500 | 3.25E+05 | 2.96E+05 | 2.01E+05 | 2.74E+05 |
|       |                             | 0.170 | 2.03E+06 | 1.77E+06 | 2.30E+06 | 2.03E+06 |
|       |                             | 0.060 | 3.01E+06 | 6.27E+06 | 4.23E+06 | 4.50E+06 |
|       |                             | 0.020 | 5.86E+06 | 2.92E+06 | 3.33E+06 | 4.03E+06 |
|       |                             | 0.000 | 3.60E+06 | 5.42E+06 | 3.64E+06 | 4.22E+06 |
| LL298 | <i>L. (V.) braziliensis</i> | 0.500 | 1.90E+06 | 1.84E+06 | 5.67E+05 | 1.44E+06 |
|       |                             | 0.170 | 1.44E+06 | 1.73E+06 | 1.66E+06 | 1.61E+06 |
|       |                             | 0.060 | 3.53E+06 | 2.99E+06 | 2.55E+06 | 3.02E+06 |
|       |                             | 0.020 | 9.60E+06 | 1.12E+07 | 1.24E+07 | 1.11E+07 |
|       |                             | 0.000 | 1.67E+07 | 1.04E+07 | 1.35E+07 | 1.35E+07 |
| LL320 | <i>L. (V.) braziliensis</i> | 0.500 | 9.26E+06 | 1.53E+07 | 1.62E+07 | 1.36E+07 |
|       |                             | 0.170 | 1.72E+07 | 1.27E+07 | 1.27E+07 | 1.42E+07 |
|       |                             | 0.060 | 2.80E+06 | 2.39E+07 | 2.36E+07 | 1.67E+07 |
|       |                             | 0.020 | 2.09E+07 | 2.80E+07 | 1.78E+07 | 2.23E+07 |
|       |                             | 0.000 | 2.39E+07 | 2.05E+07 | 1.76E+07 | 2.07E+07 |
| LL104 | <i>L. (V.) braziliensis</i> | 0.500 | 4.25E+06 | 4.01E+06 | 5.61E+06 | 4.62E+06 |
|       |                             | 0.170 | 6.10E+06 | 4.49E+06 | 6.73E+06 | 5.77E+06 |
|       |                             | 0.060 | 5.71E+06 | 6.10E+06 | 6.50E+06 | 6.10E+06 |
|       |                             | 0.020 | 6.78E+06 | 6.46E+06 | 6.36E+06 | 6.53E+06 |
|       |                             | 0.000 | 4.95E+06 | 7.22E+06 | 6.12E+06 | 6.10E+06 |
| LL321 | <i>L. (V.) panamensis</i>   | 0.500 | 1.20E+07 | 6.44E+06 | 1.24E+07 | 1.03E+07 |
|       |                             | 0.170 | 1.26E+07 | 2.41E+07 | 1.27E+07 | 1.65E+07 |
|       |                             | 0.060 | 2.31E+07 | 2.50E+07 | 1.88E+07 | 2.23E+07 |
|       |                             | 0.020 | 2.86E+07 | 2.16E+07 | 2.74E+07 | 2.59E+07 |
|       |                             | 0.000 | 2.76E+07 | 2.77E+07 | 4.08E+07 | 3.20E+07 |
| LL299 | <i>L. (V.) panamensis</i>   | 0.500 | 1.24E+07 | 1.26E+07 | 7.75E+06 | 1.09E+07 |
|       |                             | 0.170 | 1.12E+07 | 9.82E+06 | 1.09E+07 | 1.06E+07 |
|       |                             | 0.060 | 1.29E+07 | 1.36E+07 | 1.62E+07 | 1.42E+07 |
|       |                             | 0.020 | 1.82E+07 | 2.18E+07 | 2.07E+07 | 2.02E+07 |
|       |                             | 0.000 | 1.92E+07 | 2.12E+07 | 2.06E+07 | 2.03E+07 |
| LL530 | <i>L. (V.) panamensis</i>   | 0.500 | 7.14E+06 | 5.97E+06 | 1.22E+06 | 4.78E+06 |
|       |                             | 0.170 | 3.77E+06 | 4.08E+06 | 4.39E+06 | 4.08E+06 |
|       |                             | 0.060 | 1.29E+07 | 1.08E+07 | 9.21E+06 | 1.10E+07 |
|       |                             | 0.020 | 1.29E+07 | 1.21E+07 | 8.48E+06 | 1.12E+07 |

|       |                                 |       |          |          |          |          |
|-------|---------------------------------|-------|----------|----------|----------|----------|
|       |                                 | 0.000 | 1.28E+07 | 1.36E+07 | 1.22E+07 | 1.29E+07 |
| LL309 | <i>L. (V.)<br/>braziliensis</i> | 0.500 | 1.75E+06 | 8.88E+05 | 8.15E+05 | 1.15E+06 |
|       |                                 | 0.170 | 2.59E+06 | 3.46E+06 | 3.82E+06 | 3.29E+06 |
|       |                                 | 0.060 | 3.26E+06 | 4.32E+06 | 3.01E+06 | 3.53E+06 |
|       |                                 | 0.020 | 5.03E+06 | 5.56E+06 | 3.27E+06 | 4.62E+06 |
|       |                                 | 0.000 | 4.81E+06 | 6.30E+06 | 6.24E+06 | 5.78E+06 |
| LL315 | <i>L. (V.)<br/>braziliensis</i> | 0.500 | 3.42E+06 | 2.32E+06 | 6.77E+06 | 4.17E+06 |
|       |                                 | 0.170 | 5.33E+06 | 5.58E+06 | 2.65E+06 | 4.52E+06 |
|       |                                 | 0.060 | 1.30E+07 | 9.89E+06 | 1.25E+07 | 1.18E+07 |
|       |                                 | 0.020 | 2.01E+07 | 1.85E+07 | 8.95E+06 | 1.58E+07 |
|       |                                 | 0.000 | 1.92E+07 | 2.38E+07 | 2.38E+07 | 2.23E+07 |
| LL324 | <i>L. (V.)<br/>panamensis</i>   | 0.500 | 1.03E+06 | 3.50E+06 | 1.69E+06 | 2.07E+06 |
|       |                                 | 0.170 | 1.09E+07 | 1.15E+07 | 1.29E+07 | 1.17E+07 |
|       |                                 | 0.060 | 1.08E+07 | 1.32E+07 | 1.05E+07 | 1.15E+07 |
|       |                                 | 0.020 | 2.43E+07 | 1.77E+07 | 1.75E+07 | 1.98E+07 |
|       |                                 | 0.000 | 1.87E+07 | 2.29E+07 | 1.79E+07 | 1.99E+07 |
| LL329 | <i>L. (V.)<br/>braziliensis</i> | 0.500 | 1.31E+07 | 1.31E+07 | 1.27E+07 | 1.30E+07 |
|       |                                 | 0.170 | 1.58E+07 | 1.31E+07 | 1.49E+07 | 1.46E+07 |
|       |                                 | 0.060 | 1.98E+07 | 1.74E+07 | 1.91E+07 | 1.88E+07 |
|       |                                 | 0.020 | 2.36E+07 | 1.71E+07 | 1.83E+07 | 1.97E+07 |
|       |                                 | 0.000 | 2.59E+07 | 3.03E+07 | 2.52E+07 | 2.72E+07 |
| LL334 | <i>L. (V.)<br/>panamensis</i>   | 0.500 | 4.03E+06 | 5.80E+06 | 9.16E+06 | 6.33E+06 |
|       |                                 | 0.170 | 2.02E+07 | 2.90E+07 | 2.58E+07 | 2.50E+07 |
|       |                                 | 0.060 | 5.71E+07 | 4.70E+07 | 6.88E+07 | 5.77E+07 |
|       |                                 | 0.020 | 6.52E+07 | 3.63E+07 | 5.73E+07 | 5.29E+07 |
|       |                                 | 0.000 | 6.35E+07 | 5.22E+07 | 7.65E+07 | 6.41E+07 |
| LL335 | <i>L. (V.)<br/>braziliensis</i> | 0.500 | 1.57E+06 | 2.61E+06 | 1.42E+06 | 1.87E+06 |
|       |                                 | 0.170 | 5.34E+06 | 3.12E+06 | 3.12E+06 | 3.86E+06 |
|       |                                 | 0.060 | 9.49E+06 | 1.07E+07 | 9.32E+06 | 9.85E+06 |
|       |                                 | 0.020 | 1.05E+07 | 1.20E+07 | 7.97E+06 | 1.01E+07 |
|       |                                 | 0.000 | 9.21E+06 | 1.08E+07 | 8.14E+06 | 9.37E+06 |
| LL114 | <i>L. (V.)<br/>braziliensis</i> | 0.500 | 7.80E+06 | 6.83E+06 | 5.55E+06 | 6.73E+06 |
|       |                                 | 0.170 | 7.16E+06 | 6.58E+06 | 8.73E+06 | 7.49E+06 |
|       |                                 | 0.060 | 1.10E+07 | 1.00E+07 | 8.06E+06 | 9.70E+06 |
|       |                                 | 0.020 | 1.20E+07 | 1.40E+07 | 1.24E+07 | 1.28E+07 |
|       |                                 | 0.000 | 1.17E+07 | 1.29E+07 | 1.34E+07 | 1.27E+07 |
| LL386 | <i>L. (V.)<br/>panamensis</i>   | 0.500 | 3.07E+07 | 3.16E+07 | 3.06E+07 | 3.10E+07 |
|       |                                 | 0.170 | 4.82E+07 | 3.59E+07 | 4.28E+07 | 4.23E+07 |
|       |                                 | 0.060 | 4.53E+07 | 5.06E+07 | 5.00E+07 | 4.86E+07 |
|       |                                 | 0.020 | 6.43E+07 | 4.92E+07 | 3.56E+07 | 4.97E+07 |
|       |                                 | 0.000 | 6.31E+07 | 7.85E+07 | 6.48E+07 | 6.88E+07 |
| LL522 | <i>L. (V.)<br/>panamensis</i>   | 0.500 | 5.18E+06 | 5.62E+06 | 5.73E+06 | 5.51E+06 |
|       |                                 | 0.170 | 1.90E+07 | 1.70E+07 | 1.85E+07 | 1.82E+07 |
|       |                                 | 0.060 | 4.27E+07 | 4.65E+07 | 5.63E+07 | 4.85E+07 |

|       |                             |       |          |          |          |          |
|-------|-----------------------------|-------|----------|----------|----------|----------|
|       |                             | 0.020 | 4.64E+07 | 3.88E+07 | 5.01E+07 | 4.51E+07 |
|       |                             | 0.000 | 6.20E+07 | 6.31E+07 | 5.58E+07 | 6.03E+07 |
| LL574 | <i>L. (V.) panamensis</i>   | 0.500 | 1.18E+06 | 1.31E+06 | 1.57E+06 | 1.35E+06 |
|       |                             | 0.170 | 2.28E+07 | 1.21E+07 | 2.27E+07 | 1.92E+07 |
|       |                             | 0.060 | 2.85E+07 | 2.64E+07 | 2.00E+07 | 2.50E+07 |
|       |                             | 0.020 | 4.12E+07 | 3.62E+07 | 3.41E+07 | 3.72E+07 |
|       |                             | 0.000 | 3.58E+07 | 4.07E+07 | 4.15E+07 | 3.93E+07 |
| LL578 | <i>L. (V.) panamensis</i>   | 0.500 | 5.30E+05 | 5.06E+05 | 5.01E+05 | 5.12E+05 |
|       |                             | 0.170 | 3.81E+07 | 3.16E+07 | 3.58E+07 | 3.52E+07 |
|       |                             | 0.060 | 3.05E+07 | 3.48E+07 | 4.05E+07 | 3.53E+07 |
|       |                             | 0.020 | 6.57E+07 | 7.30E+07 | 7.49E+07 | 7.12E+07 |
|       |                             | 0.000 | 7.62E+07 | 7.36E+07 | 7.77E+07 | 7.58E+07 |
| LL626 | <i>L. (V.) panamensis</i>   | 0.500 | 3.55E+05 | 3.55E+05 | 4.56E+05 | 3.89E+05 |
|       |                             | 0.170 | 4.55E+05 | 3.55E+05 | 5.55E+05 | 4.55E+05 |
|       |                             | 0.060 | 3.04E+07 | 2.86E+07 | 3.19E+07 | 3.03E+07 |
|       |                             | 0.020 | 4.97E+07 | 2.17E+07 | 1.18E+07 | 2.77E+07 |
|       |                             | 0.000 | 3.08E+07 | 3.34E+07 | 3.02E+07 | 3.15E+07 |
| LL633 | <i>L. (V.) panamensis</i>   | 0.500 | 5.49E+06 | 5.94E+06 | 5.54E+06 | 5.65E+06 |
|       |                             | 0.170 | 7.55E+06 | 6.76E+06 | 7.55E+06 | 7.29E+06 |
|       |                             | 0.060 | 2.12E+07 | 1.89E+07 | 1.86E+07 | 1.96E+07 |
|       |                             | 0.020 | 1.55E+07 | 1.21E+07 | 1.98E+07 | 1.58E+07 |
|       |                             | 0.000 | 3.61E+07 | 3.39E+07 | 2.58E+07 | 3.19E+07 |
| LL323 | <i>L. (V.) panamensis</i>   | 0.500 | 4.26E+06 | 5.80E+06 | 5.82E+06 | 5.29E+06 |
|       |                             | 0.170 | 1.17E+08 | 7.72E+07 | 7.82E+07 | 9.09E+07 |
|       |                             | 0.060 | 1.22E+08 | 1.62E+08 | 1.54E+08 | 1.46E+08 |
|       |                             | 0.020 | 1.74E+08 | 1.49E+08 | 1.68E+08 | 1.64E+08 |
|       |                             | 0.000 | 2.29E+08 | 2.27E+08 | 2.23E+08 | 2.26E+08 |
| LL646 | <i>L. (V.) guyanensis</i>   | 0.500 | 2.21E+06 | 6.46E+06 | 3.99E+06 | 4.22E+06 |
|       |                             | 0.170 | 5.32E+06 | 2.35E+06 | 5.65E+06 | 4.44E+06 |
|       |                             | 0.060 | 7.73E+06 | 3.42E+06 | 7.86E+06 | 6.34E+06 |
|       |                             | 0.020 | 1.19E+07 | 9.91E+06 | 1.01E+07 | 1.07E+07 |
|       |                             | 0.000 | 9.34E+06 | 1.53E+07 | 1.39E+07 | 1.29E+07 |
| LL319 | <i>L. (V.) guyanensis</i>   | 0.500 | 8.99E+06 | 9.63E+06 | 7.19E+06 | 8.61E+06 |
|       |                             | 0.170 | 6.43E+06 | 3.82E+06 | 6.99E+06 | 5.74E+06 |
|       |                             | 0.060 | 1.19E+07 | 1.38E+07 | 1.45E+07 | 1.34E+07 |
|       |                             | 0.020 | 1.40E+07 | 1.30E+07 | 1.36E+07 | 1.35E+07 |
|       |                             | 0.000 | 1.10E+07 | 1.10E+07 | 1.54E+07 | 1.25E+07 |
| LL660 | <i>L. (V.) braziliensis</i> | 0.500 | 2.31E+06 | 3.11E+06 | 2.03E+06 | 2.48E+06 |
|       |                             | 0.170 | 2.93E+06 | 1.77E+06 | 2.24E+06 | 2.31E+06 |
|       |                             | 0.060 | 3.14E+06 | 3.40E+06 | 3.88E+06 | 3.47E+06 |
|       |                             | 0.020 | 4.50E+06 | 2.58E+06 | 3.71E+06 | 3.60E+06 |
|       |                             | 0.000 | 1.00E+07 | 6.30E+06 | 7.31E+06 | 7.88E+06 |
| LL670 | <i>L. (V.) guyanensis</i>   | 0.500 | 5.24E+06 | 2.66E+06 | 4.22E+06 | 4.04E+06 |
|       |                             | 0.170 | 1.24E+07 | 1.14E+07 | 1.22E+07 | 1.20E+07 |

|       |                                 |       |          |          |          |          |
|-------|---------------------------------|-------|----------|----------|----------|----------|
|       |                                 | 0.060 | 1.70E+07 | 1.45E+07 | 1.01E+07 | 1.39E+07 |
|       |                                 | 0.020 | 1.88E+07 | 1.71E+07 | 2.02E+07 | 1.87E+07 |
|       |                                 | 0.000 | 2.65E+07 | 1.54E+07 | 1.99E+07 | 2.06E+07 |
| LL130 | <i>L. (V.)<br/>braziliensis</i> | 0.500 | 1.00E+07 | 7.75E+06 | 1.10E+07 | 9.58E+06 |
|       |                                 | 0.170 | 9.33E+06 | 1.22E+07 | 1.29E+07 | 1.15E+07 |
|       |                                 | 0.060 | 1.24E+07 | 1.25E+07 | 1.33E+07 | 1.27E+07 |
|       |                                 | 0.020 | 1.57E+07 | 1.36E+07 | 1.38E+07 | 1.43E+07 |
|       |                                 | 0.000 | 1.49E+07 | 1.16E+07 | 1.72E+07 | 1.45E+07 |
| LL331 | <i>L. (V.)<br/>braziliensis</i> | 0.500 | 2.89E+06 | 3.59E+06 | 2.68E+06 | 3.05E+06 |
|       |                                 | 0.170 | 3.84E+06 | 4.37E+06 | 3.41E+06 | 3.87E+06 |
|       |                                 | 0.060 | 3.51E+06 | 3.29E+06 | 3.79E+06 | 3.53E+06 |
|       |                                 | 0.020 | 9.35E+06 | 8.84E+06 | 8.26E+06 | 8.82E+06 |
|       |                                 | 0.000 | 2.26E+07 | 1.90E+07 | 1.14E+07 | 1.77E+07 |
| LL360 | <i>L. (V.)<br/>braziliensis</i> | 0.500 | 7.55E+04 | 1.27E+05 | 1.06E+05 | 1.03E+05 |
|       |                                 | 0.170 | 1.60E+05 | 1.62E+05 | 1.12E+05 | 1.45E+05 |
|       |                                 | 0.060 | 1.18E+05 | 1.82E+05 | 1.08E+05 | 1.36E+05 |
|       |                                 | 0.020 | 1.16E+05 | 1.47E+05 | 1.58E+05 | 1.40E+05 |
|       |                                 | 0.000 | 2.12E+05 | 2.14E+05 | 2.49E+05 | 2.25E+05 |
| LL273 | <i>L. (V.)<br/>panamensis</i>   | 0.500 | 1.74E+06 | 1.27E+06 | 1.63E+06 | 1.55E+06 |
|       |                                 | 0.170 | 1.31E+06 | 1.13E+06 | 1.35E+06 | 1.26E+06 |
|       |                                 | 0.060 | 3.22E+06 | 3.69E+06 | 2.07E+06 | 2.99E+06 |
|       |                                 | 0.020 | 8.76E+06 | 1.39E+07 | 1.01E+07 | 1.09E+07 |
|       |                                 | 0.000 | 1.52E+07 | 1.28E+07 | 1.09E+07 | 1.30E+07 |
| LL391 | <i>L. (V.)<br/>braziliensis</i> | 0.500 | 3.88E+06 | 4.95E+06 | 4.56E+06 | 4.46E+06 |
|       |                                 | 0.170 | 5.56E+06 | 5.55E+06 | 5.46E+06 | 5.53E+06 |
|       |                                 | 0.060 | 7.21E+06 | 7.53E+06 | 5.28E+06 | 6.67E+06 |
|       |                                 | 0.020 | 6.18E+06 | 7.98E+06 | 5.17E+06 | 6.44E+06 |
|       |                                 | 0.000 | 7.51E+06 | 8.91E+06 | 7.97E+06 | 8.13E+06 |
| LL390 | <i>L. (V.)<br/>panamensis</i>   | 0.500 | 1.43E+06 | 1.22E+06 | 1.16E+06 | 1.27E+06 |
|       |                                 | 0.170 | 4.87E+06 | 3.85E+06 | 3.53E+06 | 4.08E+06 |
|       |                                 | 0.060 | 8.66E+06 | 9.26E+06 | 7.57E+06 | 8.50E+06 |
|       |                                 | 0.020 | 9.54E+06 | 8.82E+06 | 6.47E+06 | 8.28E+06 |
|       |                                 | 0.000 | 8.40E+06 | 7.30E+06 | 6.61E+06 | 7.44E+06 |
| LL381 | <i>L. (V.)<br/>panamensis</i>   | 0.500 | 2.18E+07 | 2.57E+07 | 2.17E+07 | 2.31E+07 |
|       |                                 | 0.170 | 2.18E+07 | 3.49E+07 | 2.93E+07 | 2.87E+07 |
|       |                                 | 0.060 | 2.50E+07 | 2.97E+07 | 2.52E+07 | 2.66E+07 |
|       |                                 | 0.020 | 4.35E+07 | 5.49E+07 | 3.85E+07 | 4.56E+07 |
|       |                                 | 0.000 | 4.97E+07 | 5.23E+07 | 4.34E+07 | 4.84E+07 |
| LL590 | <i>L. (V.)<br/>panamensis</i>   | 0.500 | 6.22E+06 | 6.90E+06 | 5.21E+06 | 6.11E+06 |
|       |                                 | 0.170 | 2.23E+07 | 2.60E+07 | 2.18E+07 | 2.34E+07 |
|       |                                 | 0.060 | 2.78E+07 | 3.03E+07 | 2.67E+07 | 2.83E+07 |
|       |                                 | 0.020 | 2.88E+07 | 3.20E+07 | 2.82E+07 | 2.97E+07 |
|       |                                 | 0.000 | 3.13E+07 | 3.25E+07 | 2.87E+07 | 3.08E+07 |
| LL682 | <i>L. (V.)<br/>panamensis</i>   | 0.500 | 1.10E+07 | 1.23E+07 | 9.61E+06 | 1.10E+07 |



|                                            |                               |       |          |          |          |          |
|--------------------------------------------|-------------------------------|-------|----------|----------|----------|----------|
|                                            |                               | 0.170 | 9.40E+06 | 1.79E+07 | 1.29E+07 | 1.34E+07 |
|                                            |                               | 0.060 | 1.49E+07 | 1.31E+07 | 1.52E+07 | 1.44E+07 |
|                                            |                               | 0.020 | 1.67E+07 | 1.74E+07 | 1.51E+07 | 1.64E+07 |
|                                            |                               | 0.000 | 1.50E+07 | 1.48E+07 | 1.25E+07 | 1.41E+07 |
| LL621                                      | <i>L. (V.)<br/>guyanensis</i> | 0.500 | 6.40E+06 | 7.93E+06 | 5.92E+06 | 6.75E+06 |
|                                            |                               | 0.170 | 6.01E+06 | 4.73E+06 | 5.75E+06 | 5.50E+06 |
|                                            |                               | 0.060 | 1.11E+07 | 1.71E+07 | 1.19E+07 | 1.34E+07 |
|                                            |                               | 0.020 | 1.31E+07 | 1.61E+07 | 1.12E+07 | 1.34E+07 |
|                                            |                               | 0.000 | 1.03E+07 | 1.36E+07 | 1.27E+07 | 1.22E+07 |
| Leishmania<br>guyanensis Less<br>sensitive | <i>L. (V.)<br/>guyanensis</i> | 0.500 | 1.93E+07 | 1.43E+07 | 1.60E+07 | 1.65E+07 |
|                                            |                               | 0.170 | 2.18E+07 | 2.74E+07 | 2.81E+07 | 2.58E+07 |
|                                            |                               | 0.060 | 2.59E+07 | 3.25E+07 | 2.15E+07 | 2.66E+07 |
|                                            |                               | 0.020 | 2.74E+07 | 2.44E+07 | 2.27E+07 | 2.49E+07 |
|                                            |                               | 0.000 | 2.84E+07 | 3.57E+07 | 2.39E+07 | 2.93E+07 |
