# Supplementary material for: Intraspecies differences in natural susceptibility to amphotericine B of clinical isolates of Leishmania subgenus Viannia
Source: PubMed Central journal article supplement (PMC5919572; doi:10.1371/journal.pone.0196247), 2018-04-26

**S1 Fig. Dendrogram of the susceptibility classification of Leishmania strains obtained using the EC50 values and percent reductions.** The clinical isolates were classified into different groups according to the degree of *in vitro* susceptibility to AmB using Ward's method of hierarchical classification and the EC50 values and percent reductions. A) *L. (V.) panamensis*, B) *L. (V.) braziliensis* C) *L. (V.) guyanensis*.

**A) *L. (V.) panamensis***

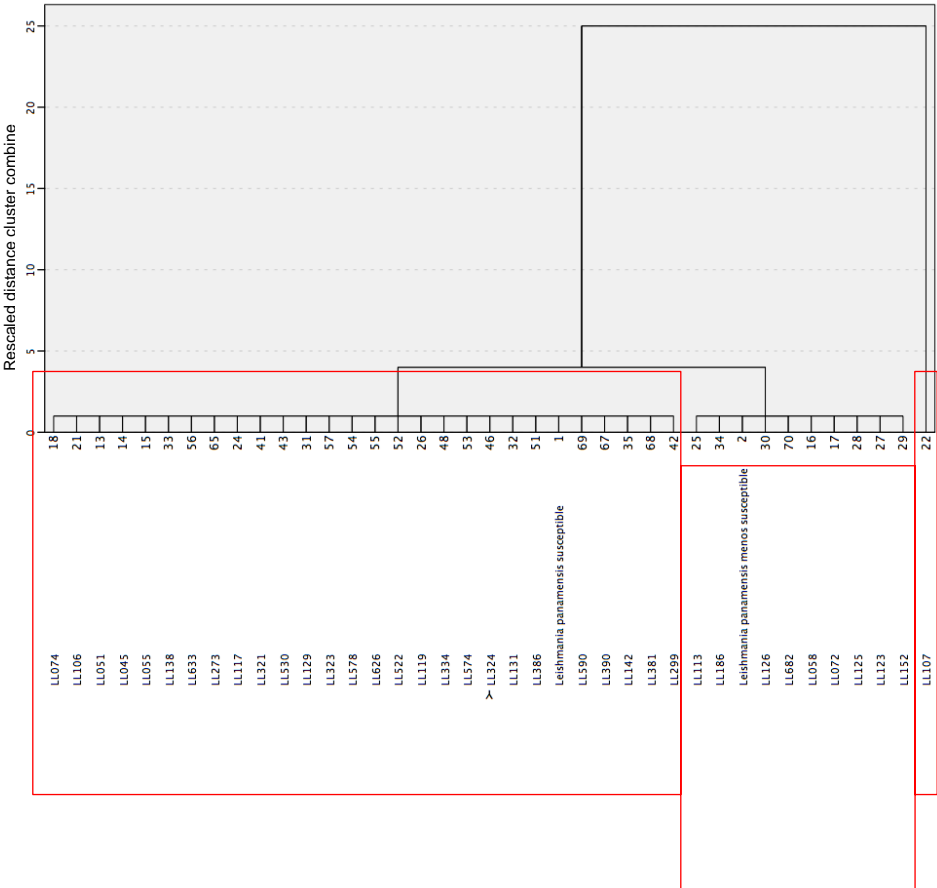

**B) *L. (V.) braziliensis***

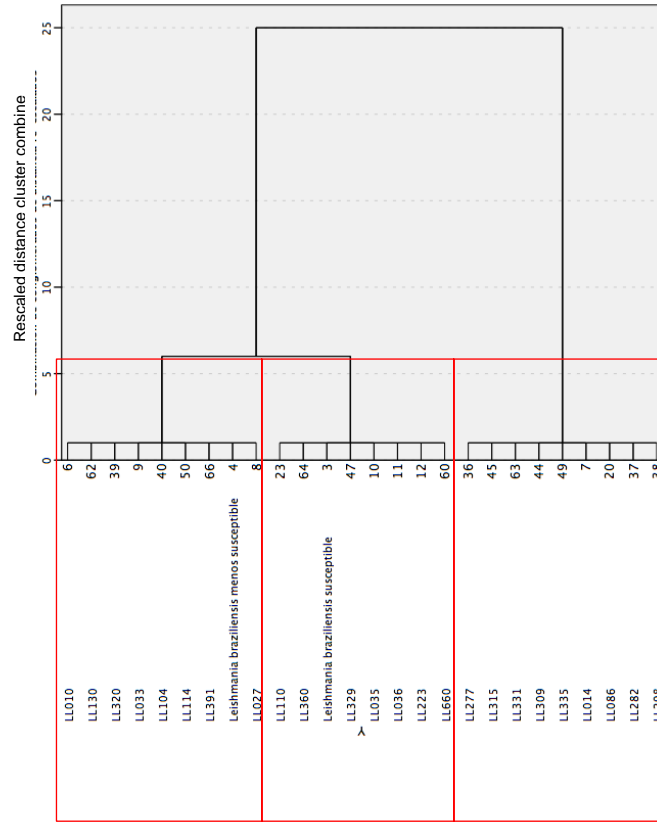

### C) *L. (V.) guyanensis*

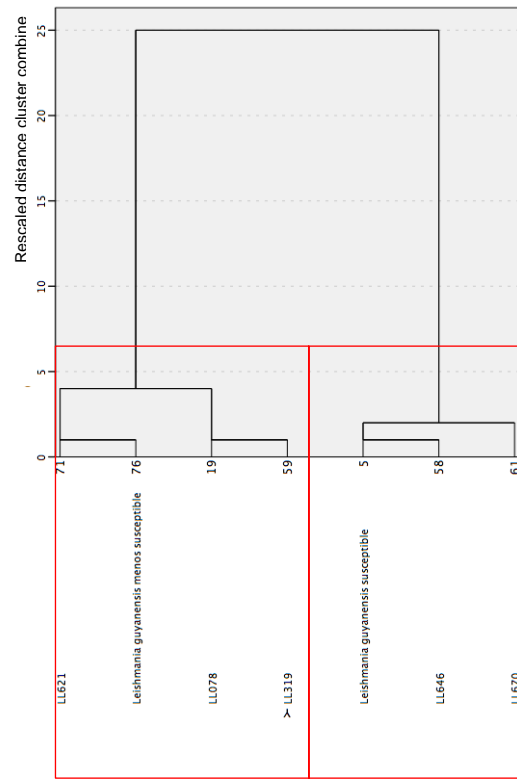

Supplement: pone.0196247.s002.pdf [file pone.0196247.s002.pdf]
